# Supplementary material
Source: PubMed Central journal article supplement (PMC7080204)

# Assist control algorithm

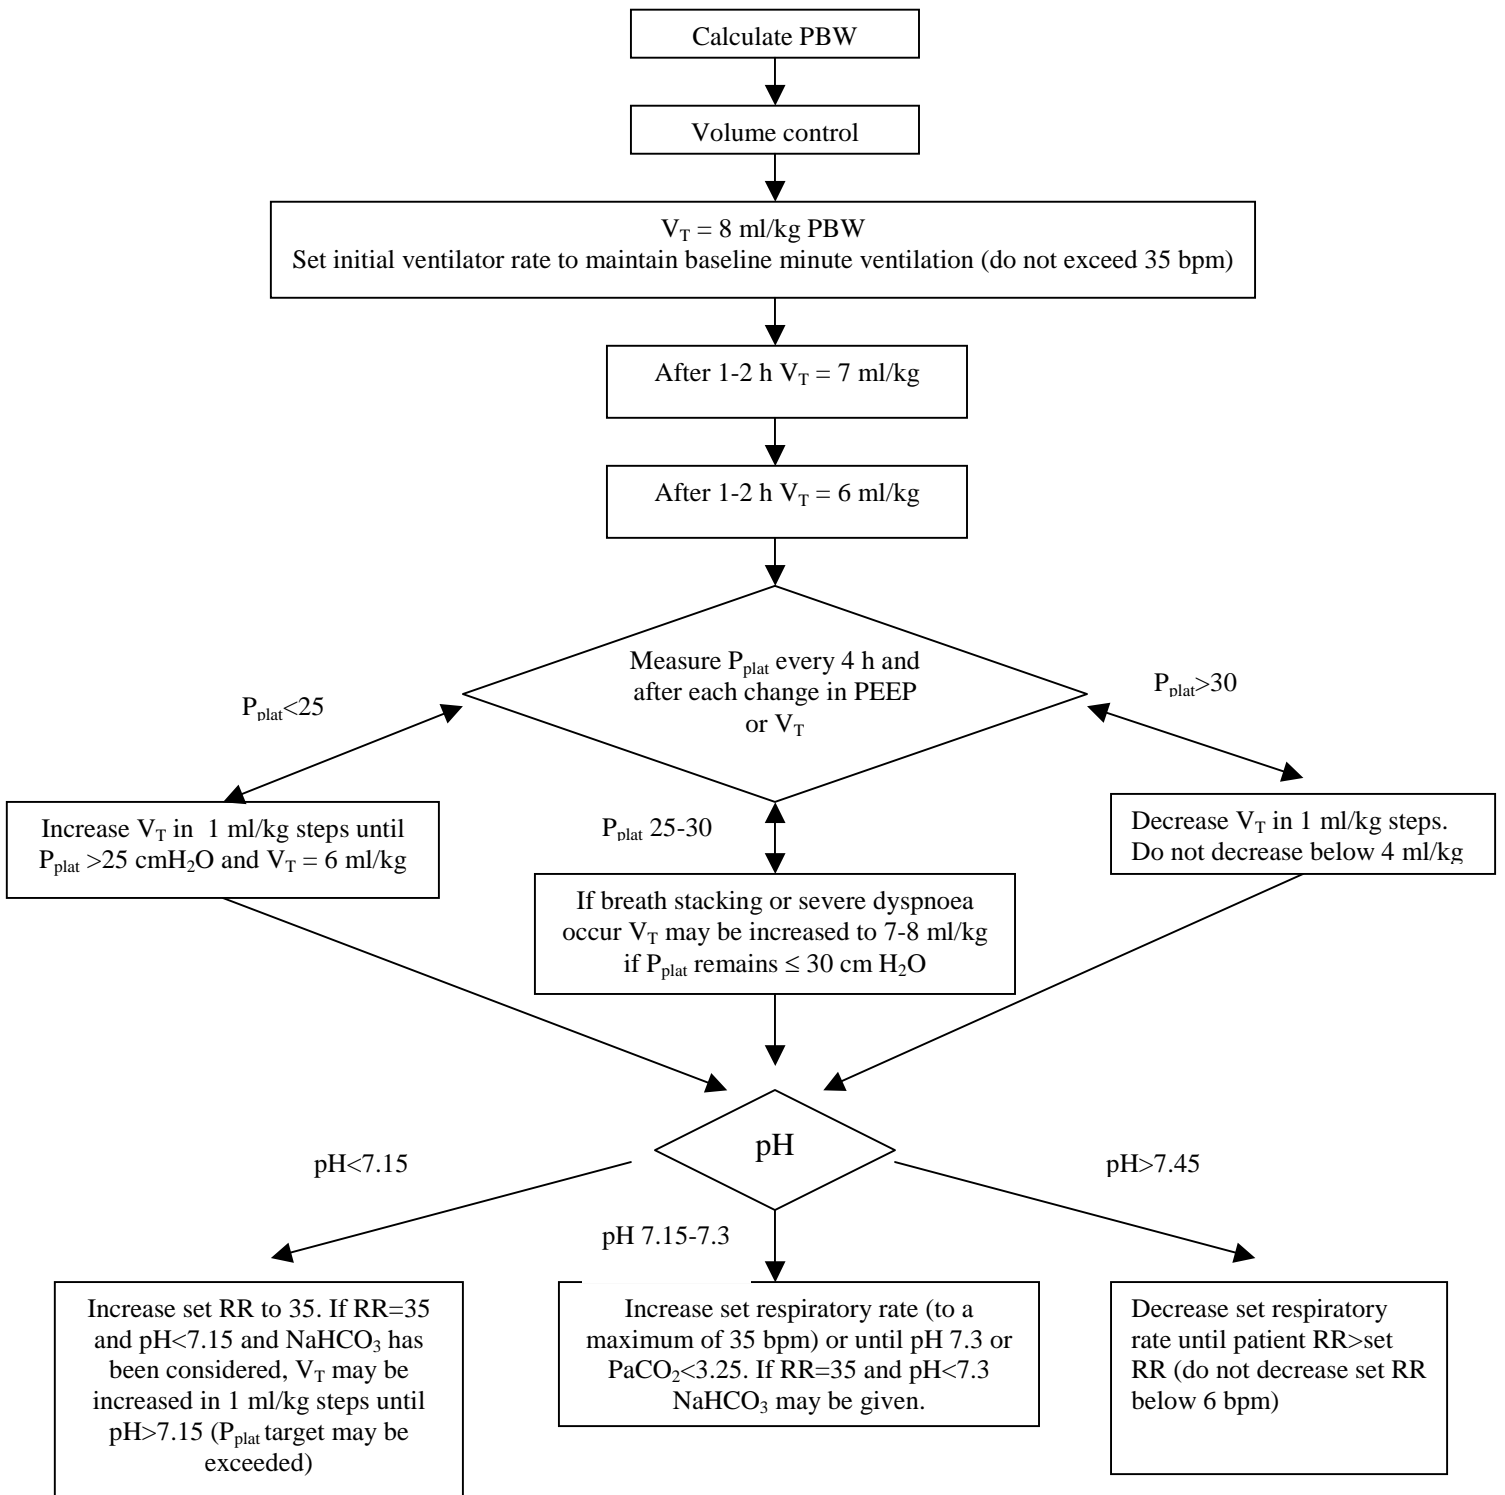

# PRVC algorithm

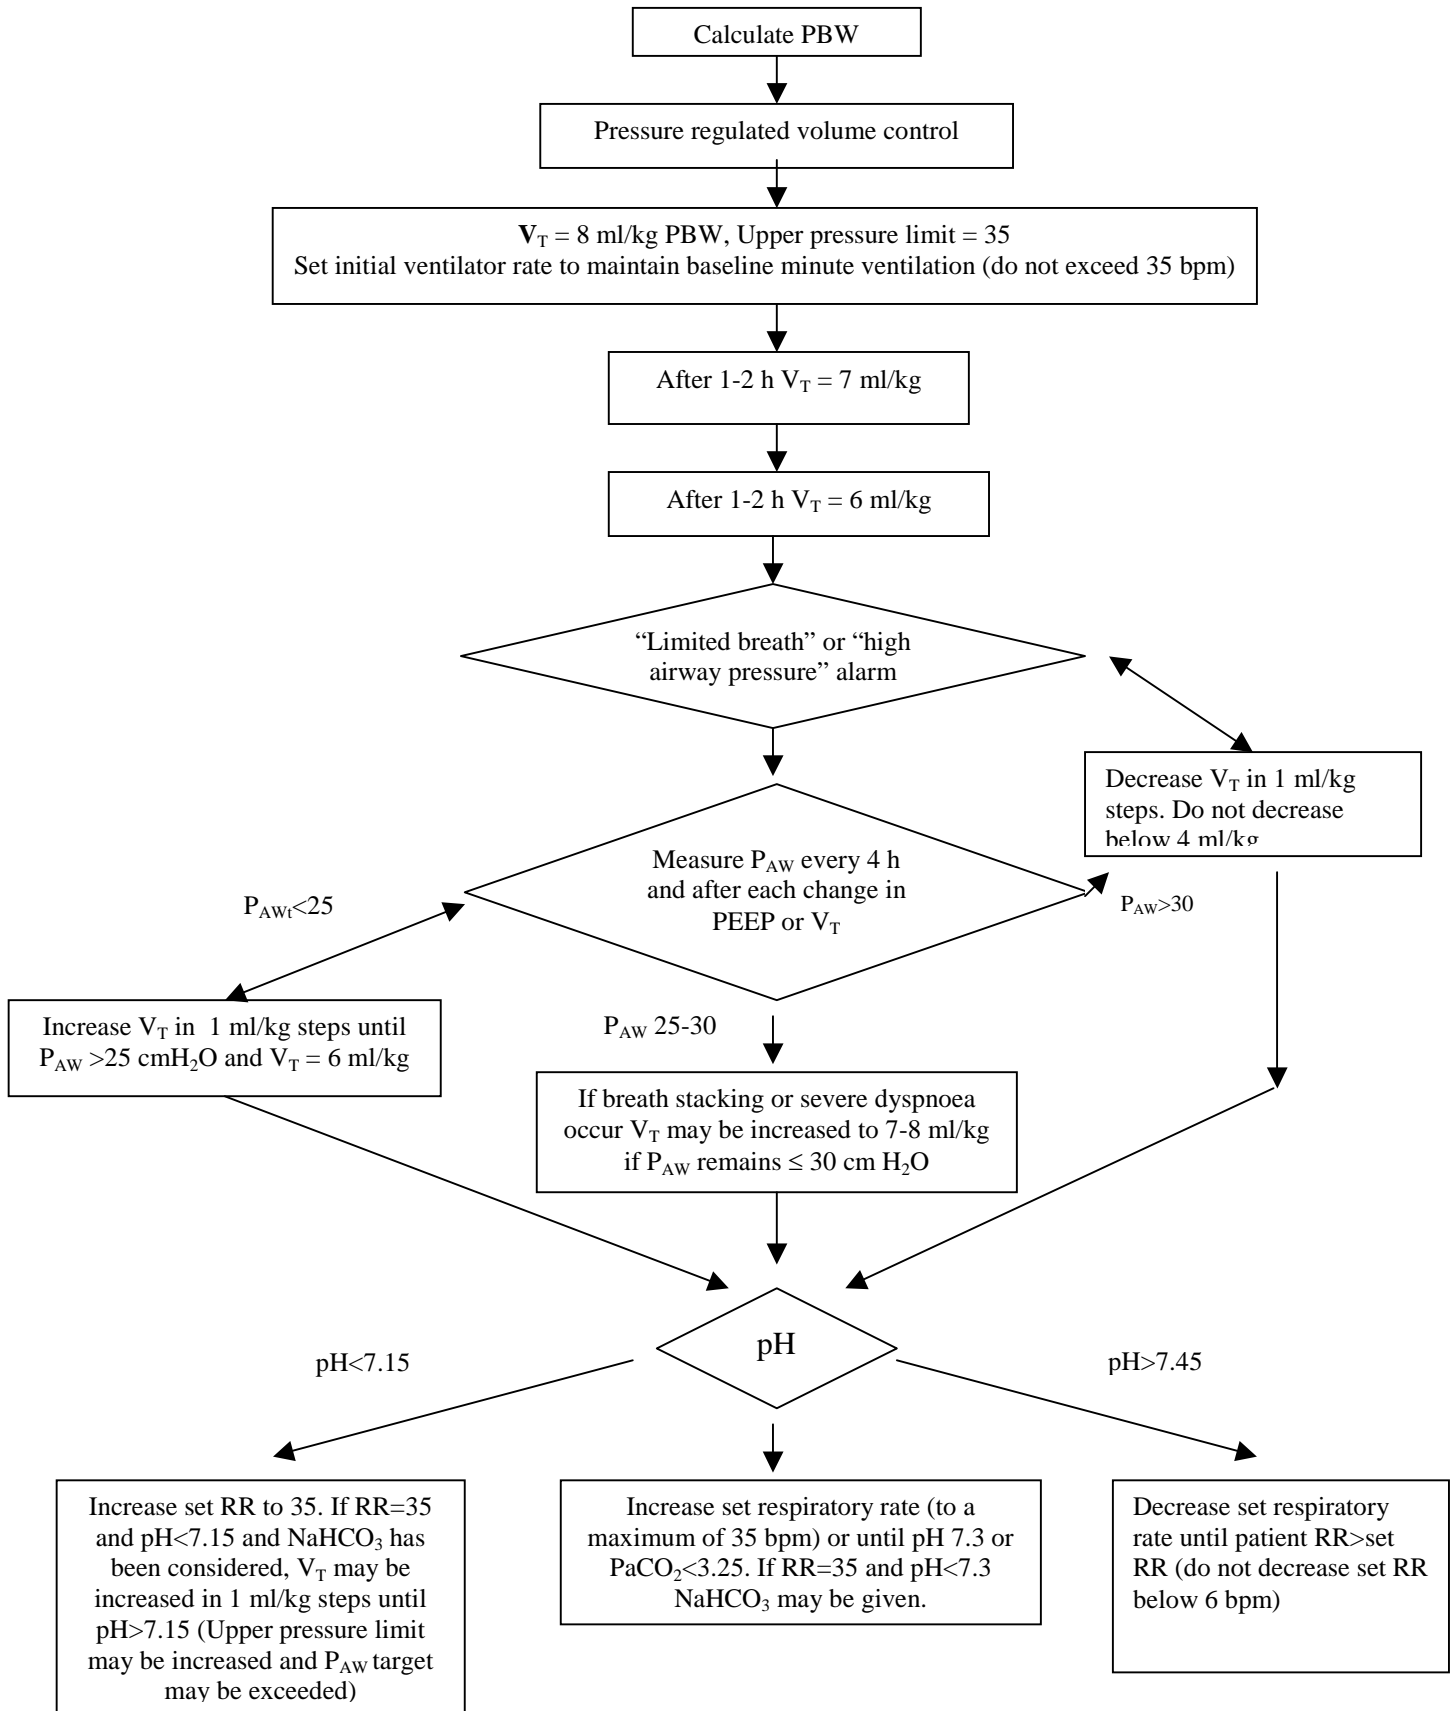

## Pressure control algorithm

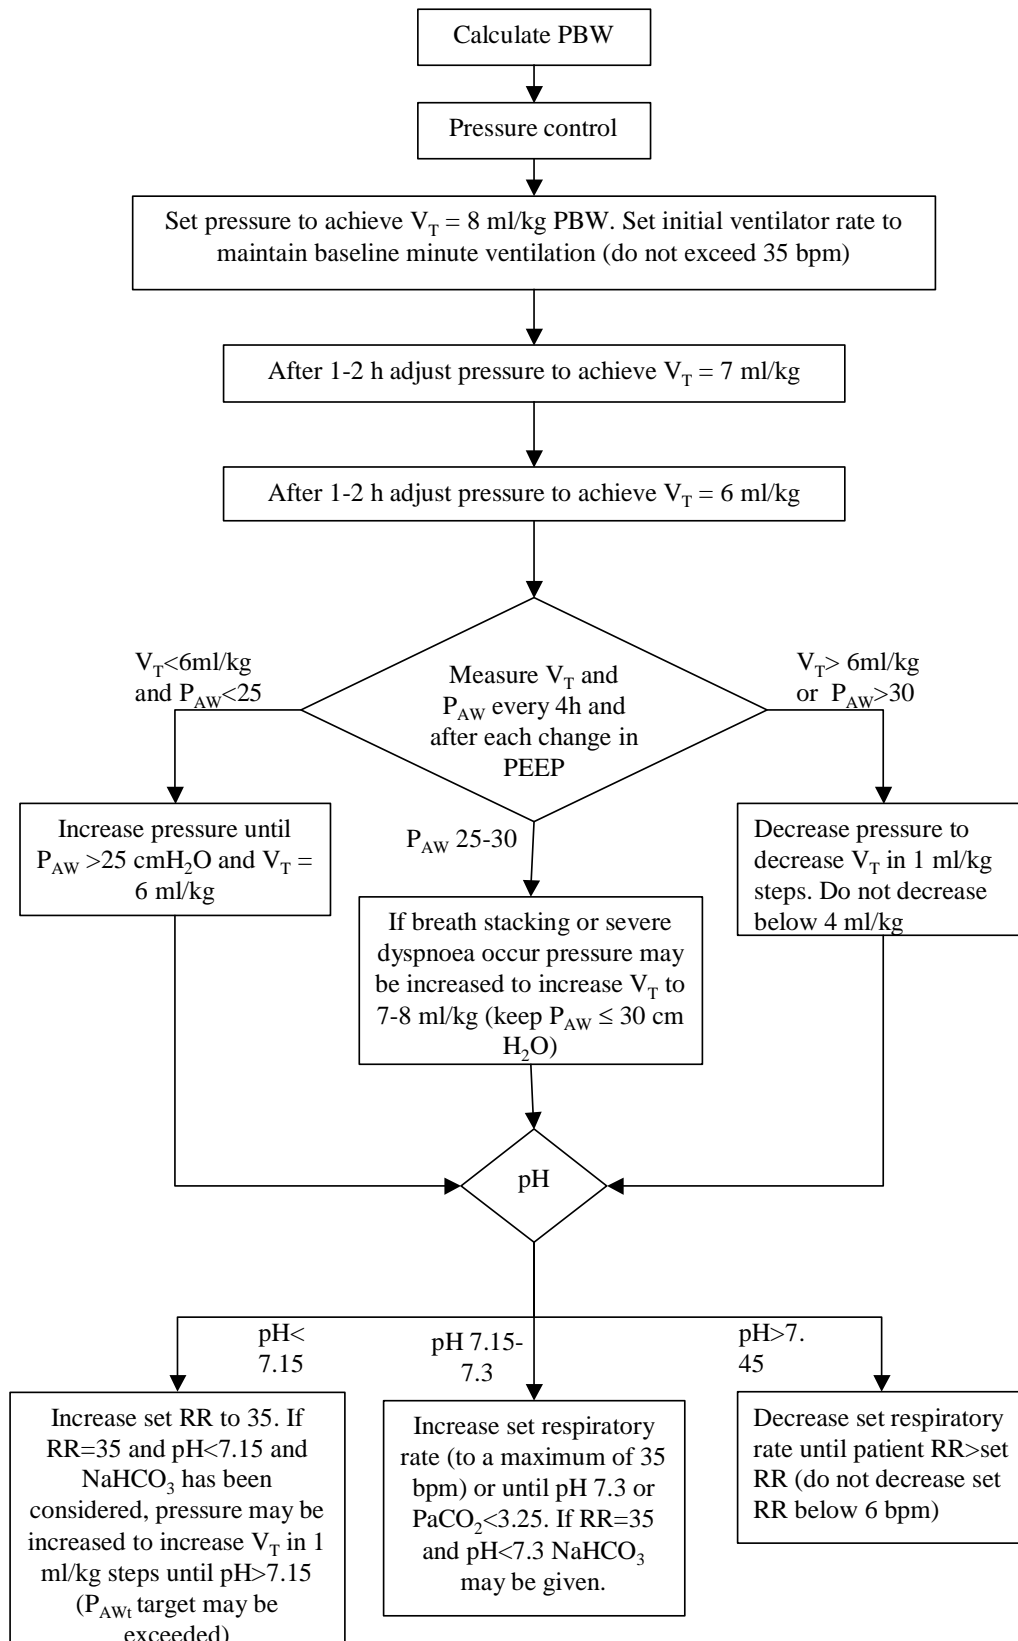

Supplement: supp.pdf [file supp.pdf]
